# Supplementary material for: GLIS3 is indispensable for TSH/TSHR-dependent thyroid hormone biosynthesis and follicular cell proliferation
Source: JCI journal article supplement (doi:10.1172/jci94417), 2017-10-29
Supplement: sd1 [file 1]

## Supplemental Information

**Supplemental Figure 1. Postnatal development of Glis3KO mice is accompanied by growth retardation.** Total body weights of WT and Glis3KO mice were measured at the indicated times. Data were shown as mean  $\pm$  SEM ( $n \geq 8$  for each group). Student's t test. \*  $p < 0.05$ , \*\*  $p < 0.001$ .

**Supplemental Figure 2. Apoptotic cells were not observed in thyroid glands from WT and Glis3KO mice.** Thyroids from 1 month old WT and Glis3KO mice were examined for the presence of apoptotic cells by TUNEL assay using an *In Situ* Cell Death Detection Fluorescein Kit and DAPI as described in Materials and Methods. Scale bar: 50  $\mu\text{m}$ .

**Supplemental Figure 3. Analysis of blood T4 levels in one week old WT and Glis3KO mice.** Although there was a tendency to lower circulating T4 levels in Glis3KO mice, the difference was not statistically significant. Data were shown as mean  $\pm$  SEM ( $n \geq 6$  for each group). Student's t test.

**Supplemental Figure 4. Volcano plot of RNA-Seq gene expression profiles of WT and Glis3KO thyroid glands.** RNA isolated from thyroid glands of WT-LID and KO-LID mice were analyzed by RNA-Seq. Global pattern of expression was shown as a volcano plot with fold change ( $\text{Log}_2$ ) and  $P$  value ( $-\log_{10}$ ). Genes with  $\geq 2$  fold change and a  $P$  value  $\leq 0.05$  are indicated by red dots. Specific genes are indicated by green triangles.

**Supplemental Figure 5. Proliferation of thyroid follicular cells was greatly reduced in KO mice.** (A) The number of phosphorylated histone H3 (pH3) positive cells (Green) was examined in thyroid glands of WT and Glis3KO mice fed either a ND or LID by immunofluorescent staining. Wheat germ agglutinin (WGA, Red) was used to define thyroid epithelial cells. Scale bar: 50  $\mu$ m. (B) The number of pH3<sup>+</sup> cells was counted and plotted ( $n \geq 2$  for each group). Student's t test. \*  $p < 0.05$ , \*\*  $p < 0.001$ .

**Supplemental Figure 6. Levels of phosphorylated AMPK and PKA were not altered in thyroid glands of Glis3KO mice.** Protein lysates obtained from thyroid glands of WT and Glis3KO mice fed either a ND or LID were examined by Western blot analysis using phospho-AMPK, phospho-PKA, and GAPDH antibodies.

**Supplemental Figure 7. The expression of TTF1 protein was not significantly different between thyroid glands of WT and Glis3KO mice.** Representative images of sections of WT and Glis3KO thyroid glands examined by immunohistochemistry with antibodies against TTF1 (red) and PECAM (green). Scale bar: 50  $\mu$ m.

**Supplemental Figure 8. Heatmap of the density of GLIS3-ChIP signals within a 5-kb window surrounding predicted GLIS3 peaks.** Each line in the heatmap represents an individual GLIS3 binding site (read count = 15,920). Lower panel: Plot of the average density of GLIS3-ChIP signals relative to GLIS3 peaks.

**Supplemental Figure 9. Venn diagram of gene-sets enriched for GLIS3-associated genes, and genes up- or down-regulated in the thyroid glands of KO-LID mice.**

RNA-Seq analysis identified 3420 differentially expressed genes, while ChIP-Seq analysis identified 3374 GLIS3-associated genes of which 453 genes were differentially expressed.

**Supplemental Figure 10. GLIS3 was enriched at the NUE region of the *Nis* gene.** (A)

ChIP-PCR was performed to validate the enrichment of GLIS3 at the -1kb and -2.8 kb (NUE region) of the *Nis* upstream promoter in thyroid glands from WT and Glis3-EGFP mice. (B) Genome browser shot of the GLIS3-EGFP occupancy at the *Nis* genome as identified by ChIP-Seq analysis. (C) PAX8 occupancy at the *Nis* genome was extracted from a previous report (1) and visualized as a gene browser shot. Both GLIS3 and PAX8 bind the NUE enhancer region in the *Nis* promoter. Data were shown as mean  $\pm$  SEM (n=3 for each group). Student's t test. \* p<0.05.

**Supplemental Figure 11. Activation of NUE promoter by GLIS3.** A luciferase

reporter driven by the NUE promoter region (pTAL-NUE) was used to examine the transcription activation by Glis3 and PAX8 in HEK293T cells. Data were shown as mean  $\pm$  SEM (n=3 for each group). Student's t test. \* p<0.0001, compared to first lane.

**Supplemental Figure 12. GLIS3 did not interact with PAX8 or TTF1.** Human kidney

HEK293T cells were transfected with p3XFLAG-CMV-HA expressing either full-length

GLIS3, N-terminus deletion mutant GLIS3 $\Delta$ N, or C-terminal deletion mutant GLIS3 $\Delta$ C, with or without pcDNA-Ttf1 or pcDNA-Pax8 as indicated. After 24 h incubation, GLIS3-HA protein complexes were isolated with anti-HA antibody and examined by Western blot analysis with antibodies against HA and TTF1 or PAX8. Cotransfection with p3XFLAG-CMV-HA-GLIS3FL and pCMV-Sufu-Myc was used as a positive control. Data shown are representative of two independent experiments.

**Supplemental Table 1. Pathway analysis was performed with genes down-regulated in thyroid glands from Glis3KO mice fed a ND using various databases, including KEGG (A), Reactome (B), and Biocarta (C), or genes up-regulated in thyroid glands from Glis3KO mice fed a ND using a KEGG pathway analysis (D).** Gene expression data were generated by microarray analysis.

**Supplemental Table 2. Pathway analysis was performed with genes down-regulated in thyroid glands from KO-LID mice using various databases, including KEGG (A), Reactome (B), and Biocarta (C), or GO biological process (D).** Gene expression data were generated by RNA-Seq analysis.

**Supplemental Table 3. Fold-change in the expression of a selected number of genes that are regulated directly or indirectly by GLIS3.** The expression and GLIS3 occupancy of a selected number of genes related to cell cycle/proliferation, TH biosynthesis, fibrosis/ECM, and inflammation are compared between thyroid glands from Glis3KO and WT mice fed either a ND or LID. Gene expression data were derived by

microarray or RNA-Seq analysis, and GLIS3 occupancy by ChIP-Seq analysis as indicated. In the column with ChIP-Seq results: +, indicates enrichment for GLIS3 binding within the respective gene; -, no enrichment.

**Supplemental Table 4A. List of all GLIS3 target genes identified by ChIP-Seq analysis. Pathway analysis was performed using various databases, including KEGG (B), Reactome (C), and Biocarta (D), and analysis of GO biological process (E).**

**Supplemental Table 5A. List of genes identified by ChIP-Seq that are down-regulated in thyroid glands of Glis3KO mice fed a LID. B. List of genes identified by ChIP-Seq that are up-regulated in thyroid glands of Glis3KO mice fed a LID. C. GO biological process analysis of genes identified by ChIP-Seq that are down-regulated in thyroid from Glis3KO mice fed an LID using a program from David Bioinformatics Resources.**

**Supplemental Table 6.**

**List of primers used for QRT-PCR analysis.**

**60. Ruiz-Llorente S, et al. Genome-wide analysis of Pax8 binding provides new insights into thyroid functions. BMC Genomics. 2012;13:147.**

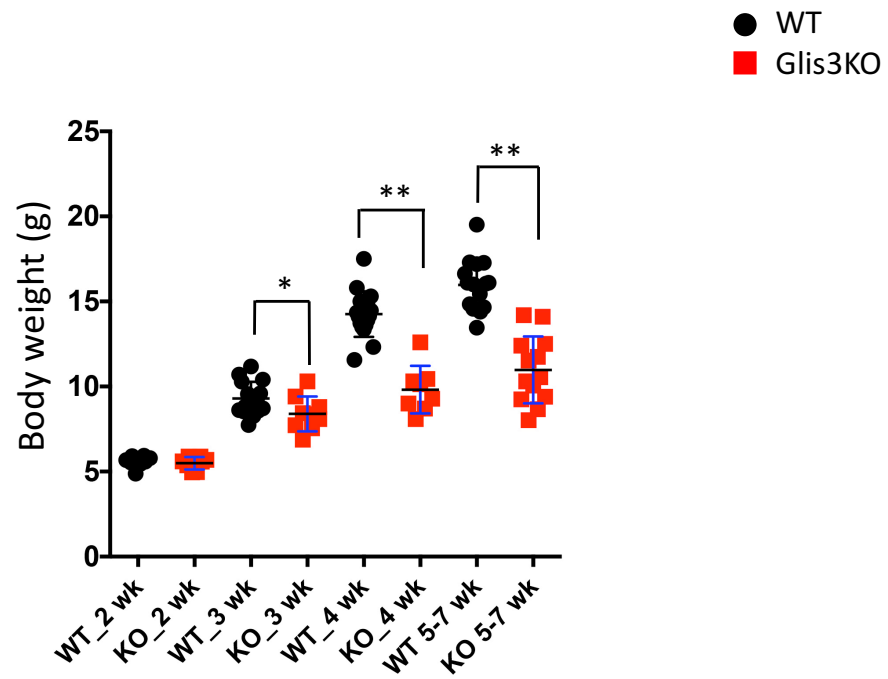

Supplemental Figure 1

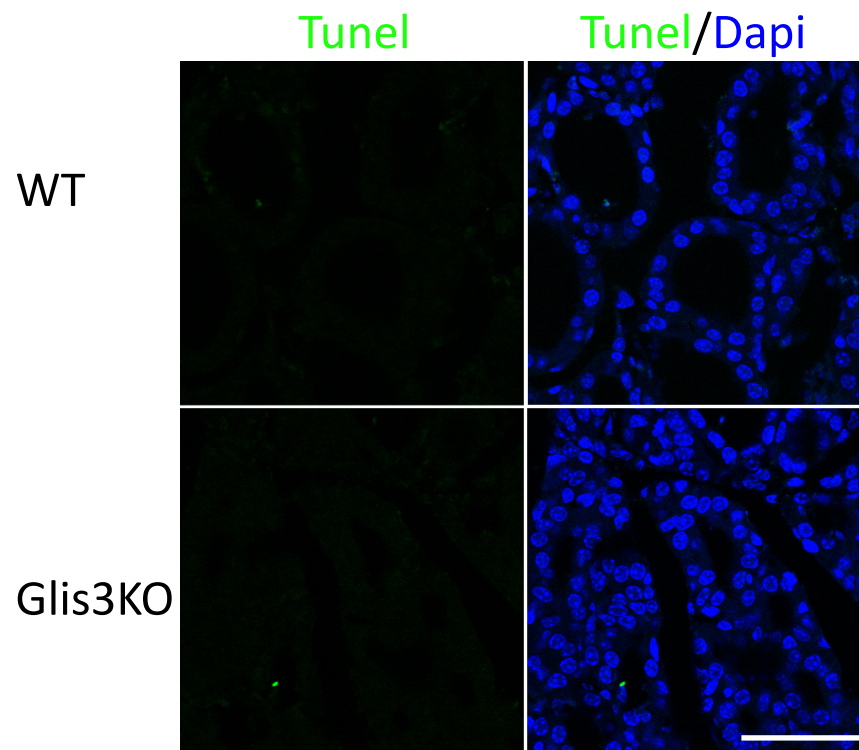

Supplemental Figure 2

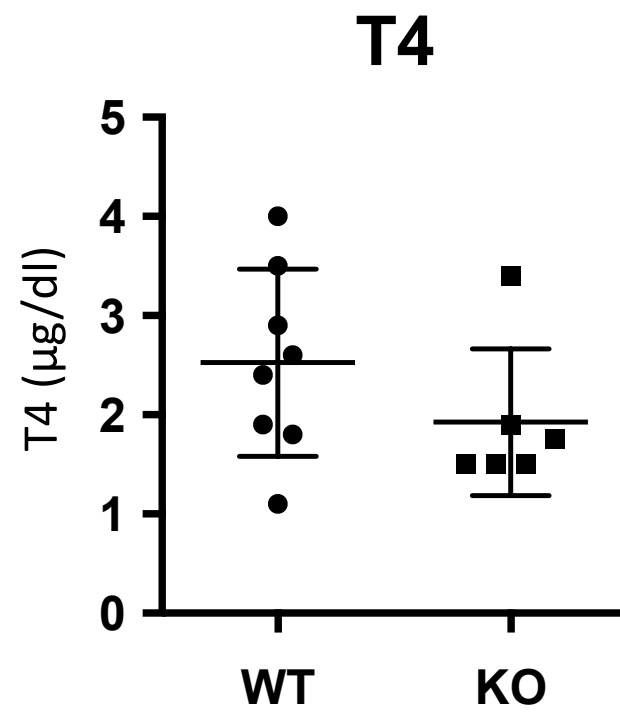

Supplemental Figure 3



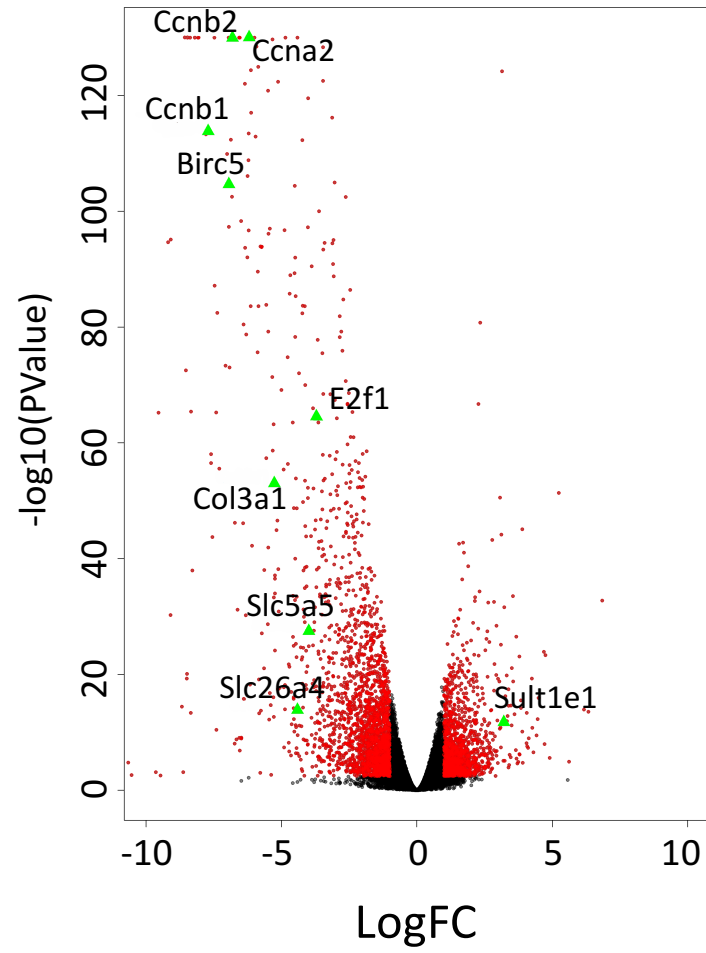

Supplemental Figure 4

**A**

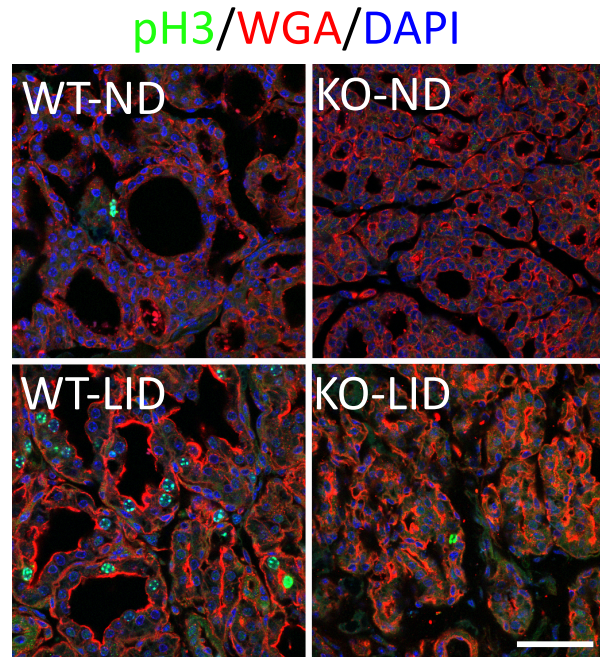

**B**

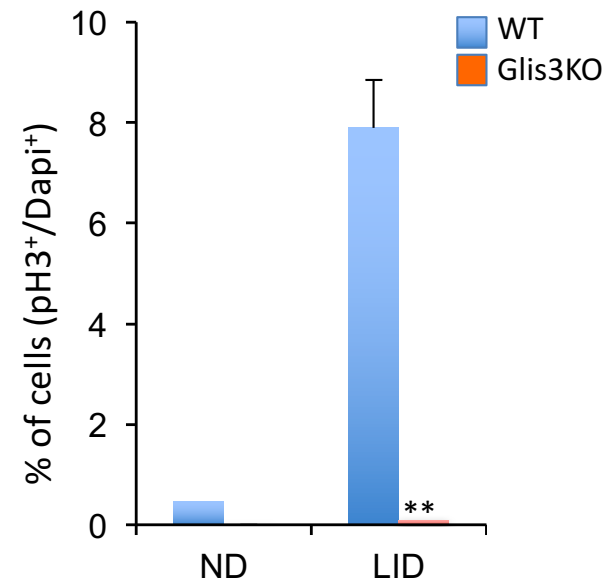

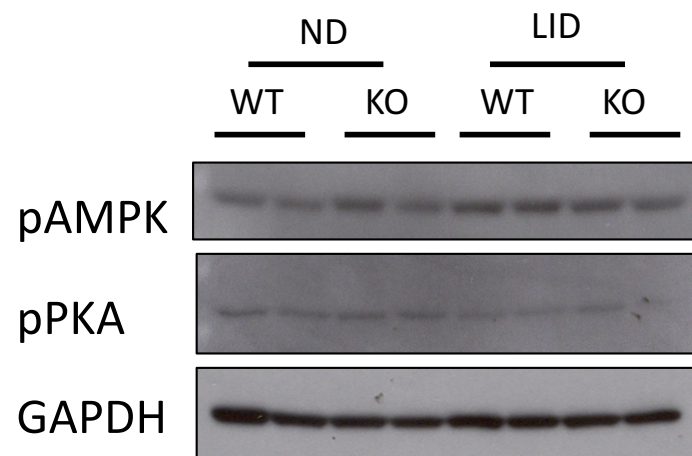

Supplemental Figure 6

NKX2.1/PECAM

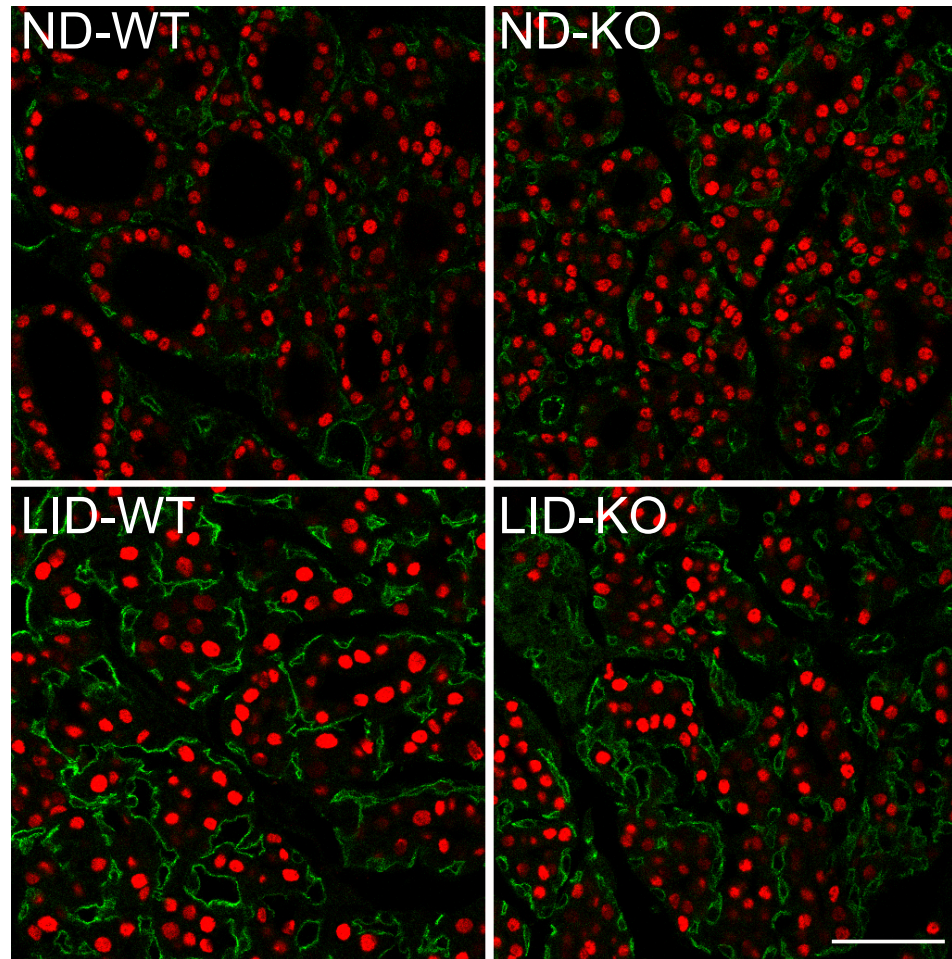

Supplemental Figure 7

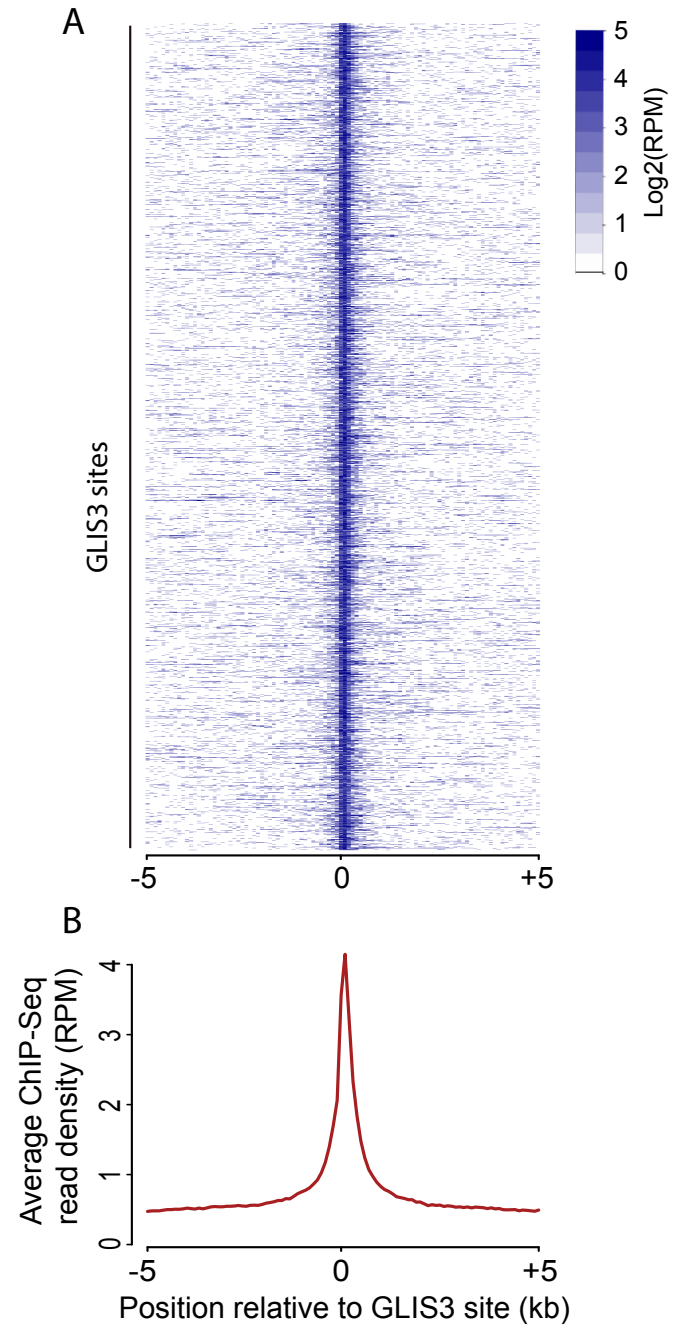

Supplemental Figure 8

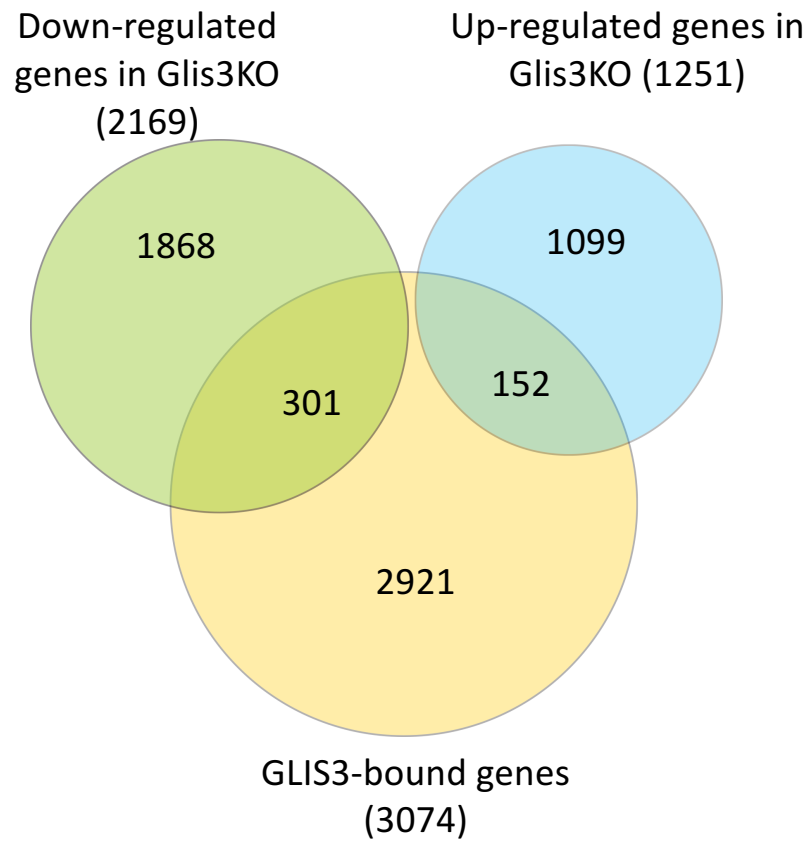

Supplemental Figure 9

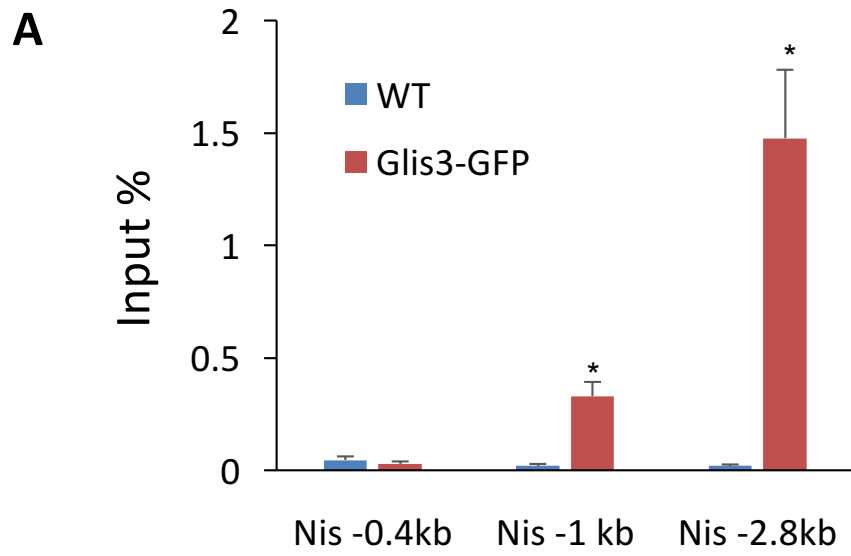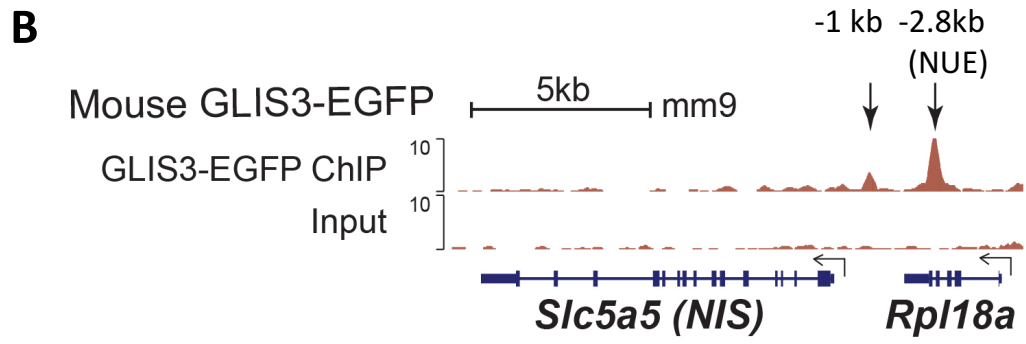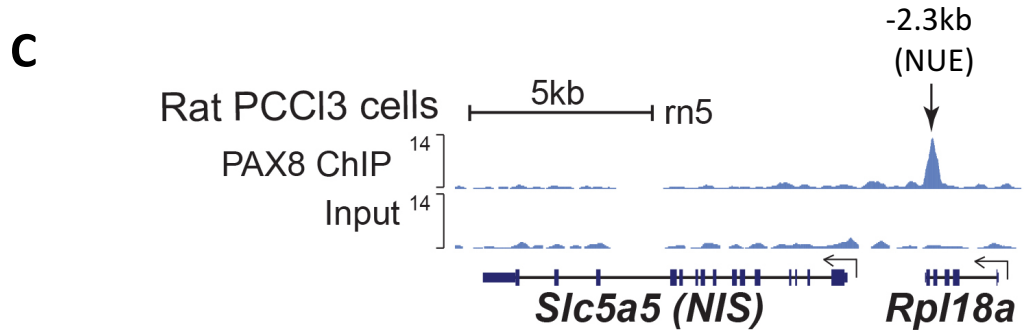

Supplemental Figure 10

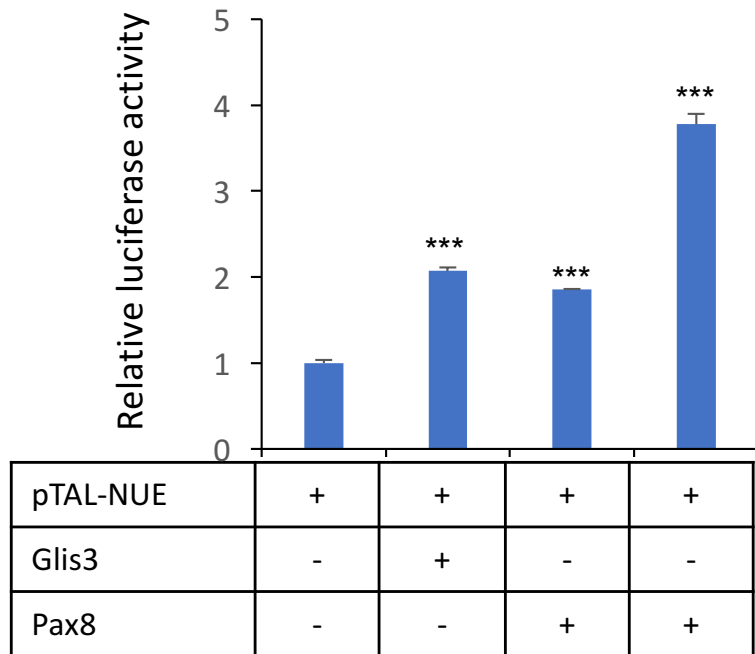

Supplemental Figure 11



|                     |   |   |   |   |   |   |
|---------------------|---|---|---|---|---|---|
| GLIS3FL-HA          | + | + | - | - | - | - |
| GLIS3 $\Delta$ N-HA | - | - | + | + | - | - |
| GLIS3 $\Delta$ C-HA | - | - | - | - | + | + |
| NKX2.1              | - | + | - | + | - | + |

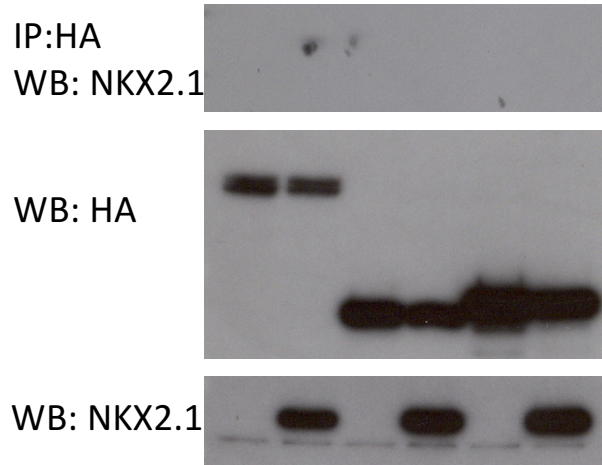

|            |   |   |
|------------|---|---|
| GLIS3FL-HA | + | + |
| Sufu-Myc   | - | + |

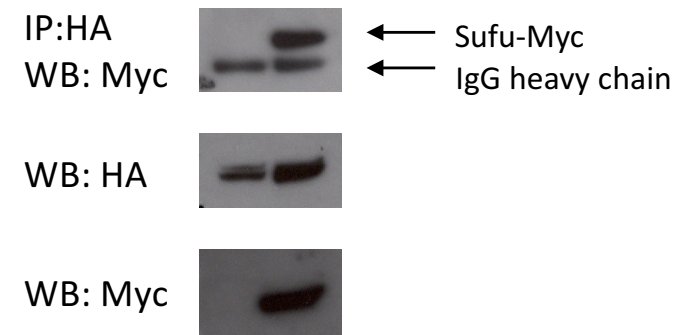

|                     |   |   |   |   |   |   |
|---------------------|---|---|---|---|---|---|
| GLIS3FL-HA          | + | + | - | - | - | - |
| GLIS3 $\Delta$ N-HA | - | - | + | + | - | - |
| GLIS3 $\Delta$ C-HA | - | - | - | - | + | + |
| PAX8                | - | + | - | + | - | + |

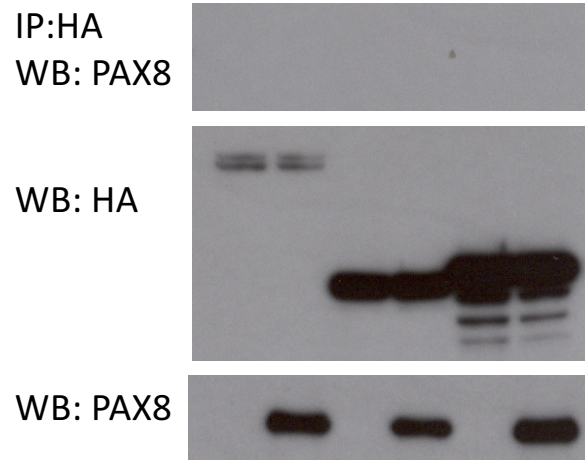

Supplemental Figure 12
